# Supplementary material for: Identifying Genetic Architecture of Carcass and Meat Quality Traits in a Ningxiang Indigenous Pig Population
Source: Preprints.org preprint supplement (doi:10.20944/preprints202305.0989.v1), 2023-05-15
Supplement: Supplementary file 1 [file supplementary]

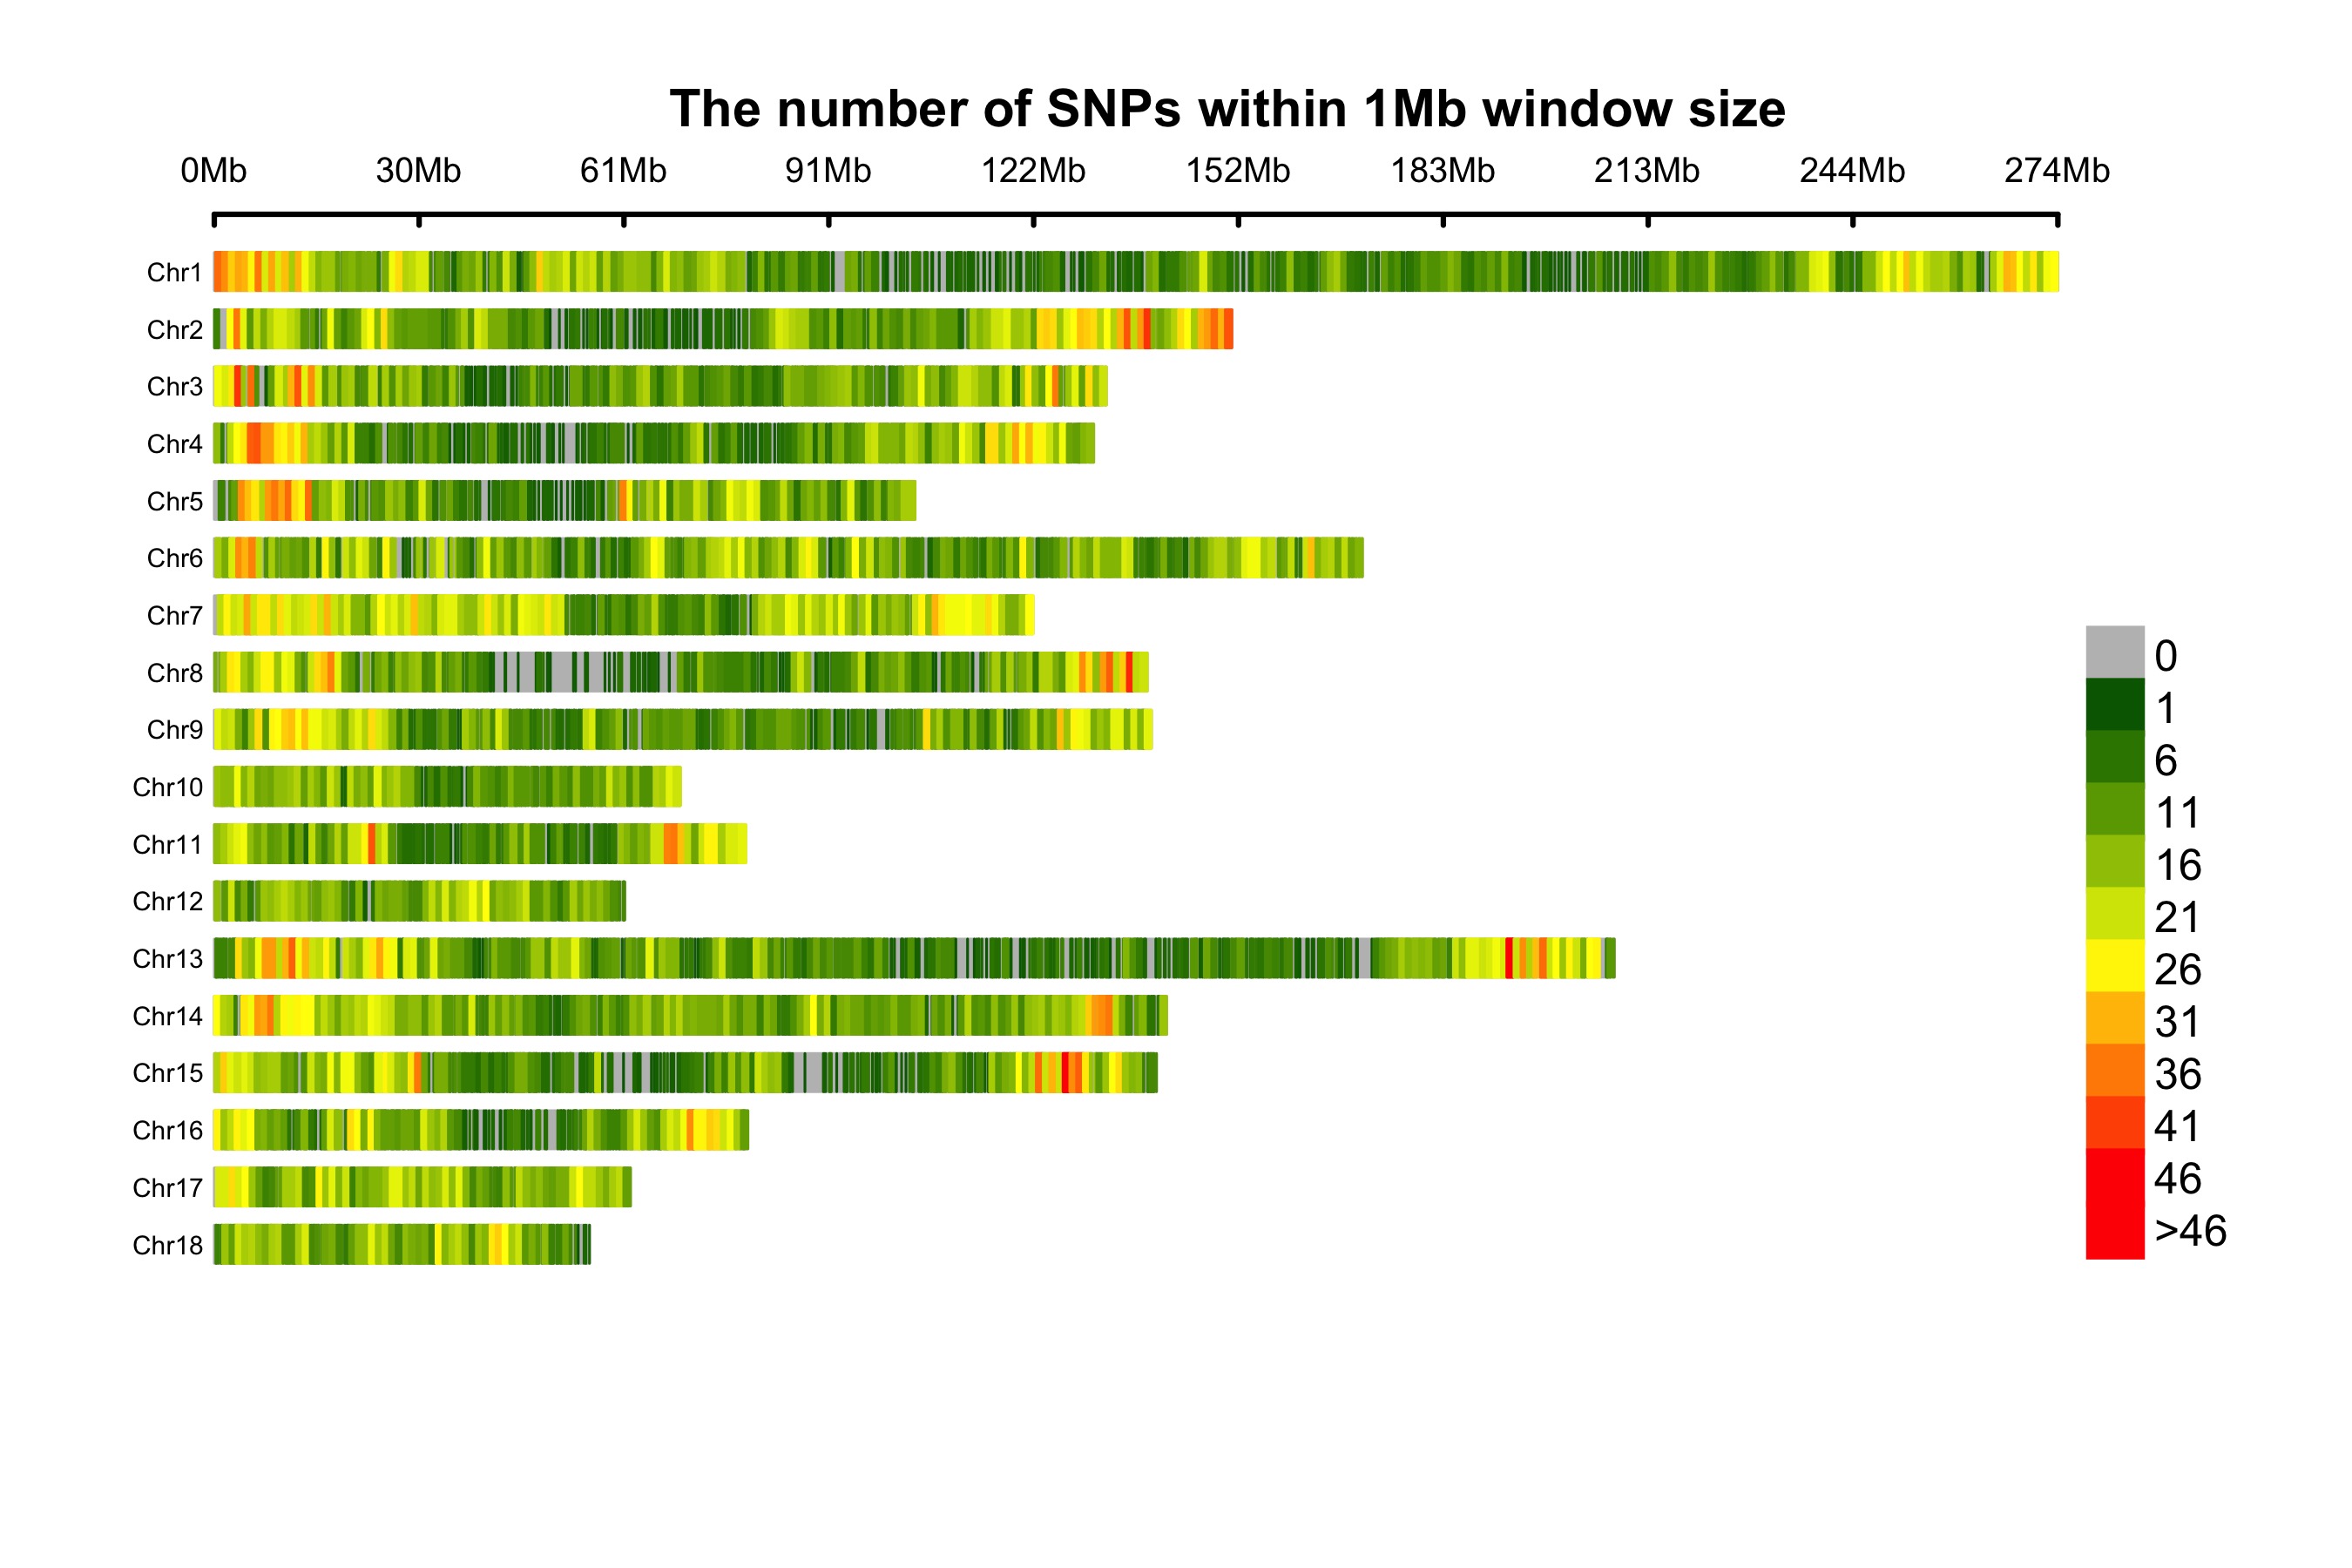


**Figure S1.** SNP density after quality control.

**Figure S2.** Principal component analysis of 508 animals.


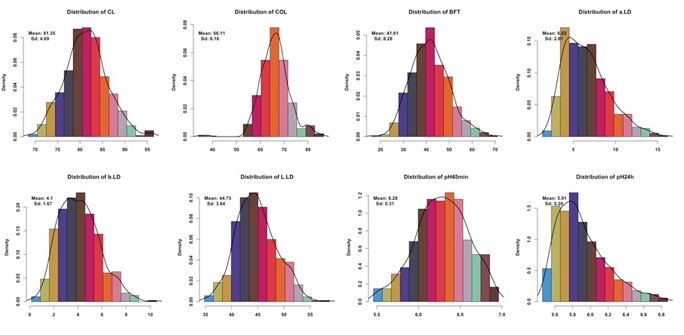


**Figure S3.** Phenotypic distribution of eight traits. Sd represents standard deviation.

**Figure S4**. Manhattan and Q-Q plots for 4 traits (b.LD, L.LD, pH45min,pH24h). The red line is the genome-wide threshold (0.05/31,106) and the blue line (1/31,106) is the suggestive threshold. The -log10(*P*-value) of each SNP (y-axis) across the chromosomes (x-axis), along with the corresponding Q-Q plots. The λ represents genomic inflation factors.
